# Supplementary material for: A DFT-design of single component bifunctional organocatalysts for the carbon dioxide/propylene oxide coupling reaction
Source: Royal Society of Chemistry journal article supplement (doi:10.1039/d1cp04091j), 2021-01-01
Supplement: d1cp04091j1.pdf [file d1cp04091j1.pdf]

Supporting Information

For

**A DFT-Weaving of Single Component Bifunctional Organocatalysts for  
Carbon dioxide/Propylene Oxide Coupling Reaction**

Morad M. El-Hendawy\*, Ibtessam M. Desoky, Mahmoud M. A. Mohamed  
Department of Chemistry, Faculty of Science, New Valley University, Kharga 72511, Egypt

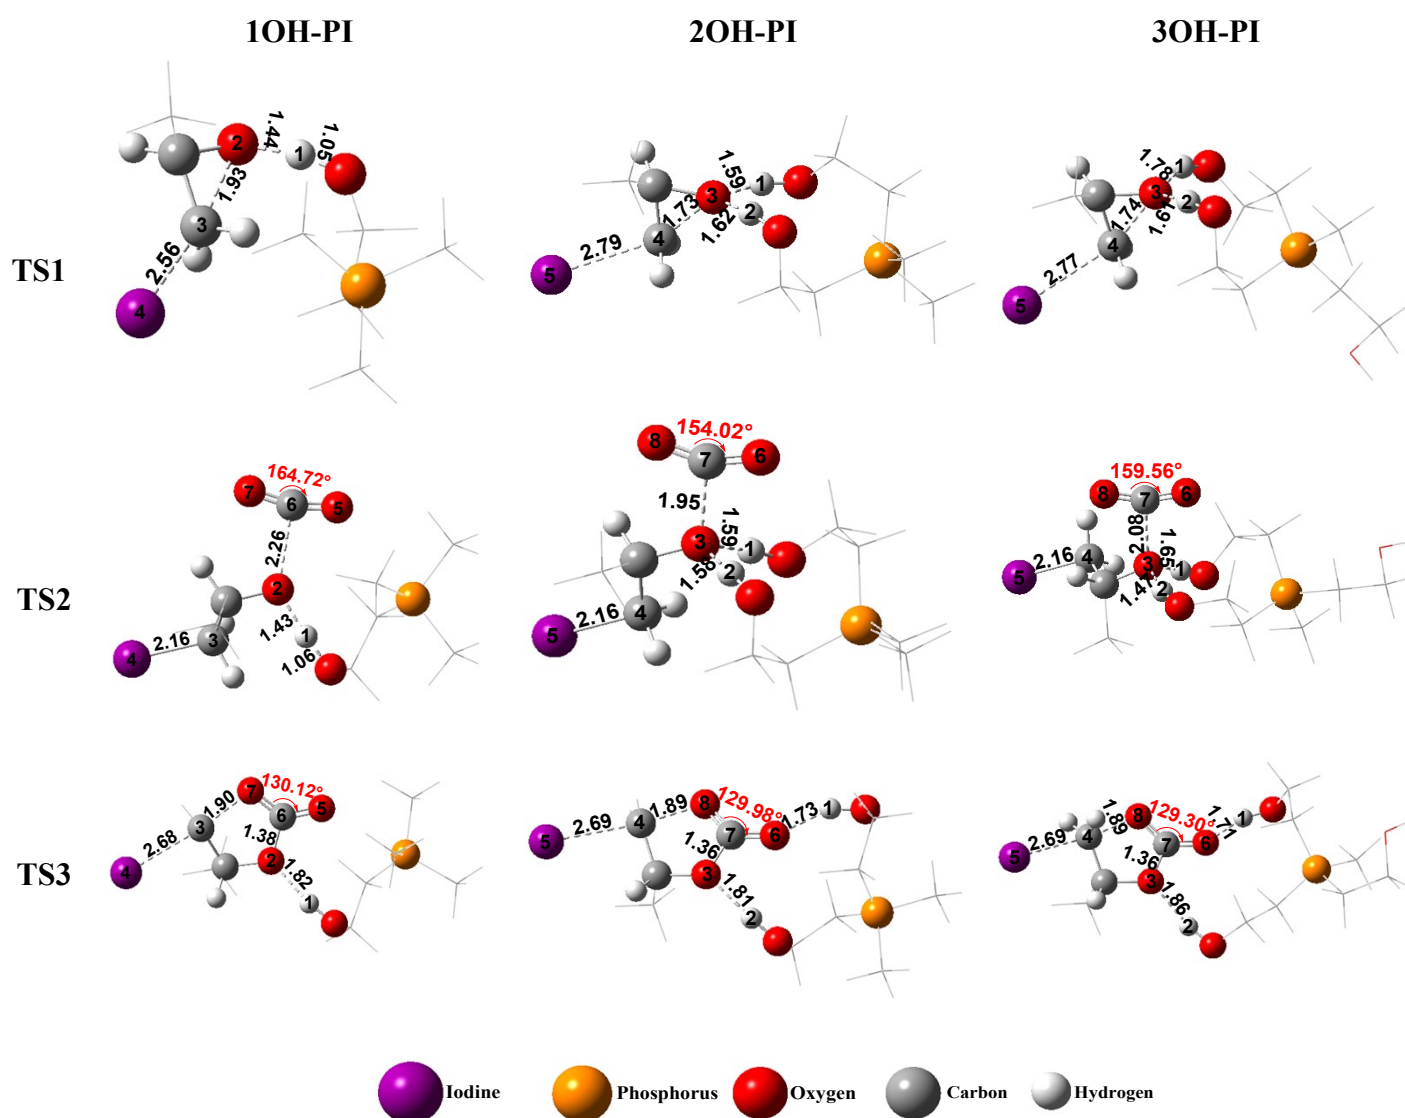

**Fig. S1.** The optimized structures of the transition states of **1OH-PI**, **2OH-PI**, and **3OH-PI** catalysts. Dotted lines indicate hydrogen-bonding interactions, the bond formed, and bond breaking. Distances are shown in Å. Nonessential atoms were selected as low-layer. **1OH-PI**, **2OH-PI**, and **3OH-PI** catalysts. Dotted lines indicate hydrogen-bonding interactions, the bond formed, and bond breaking. Distances are shown in Å. Nonessential atoms were selected as low-layer.

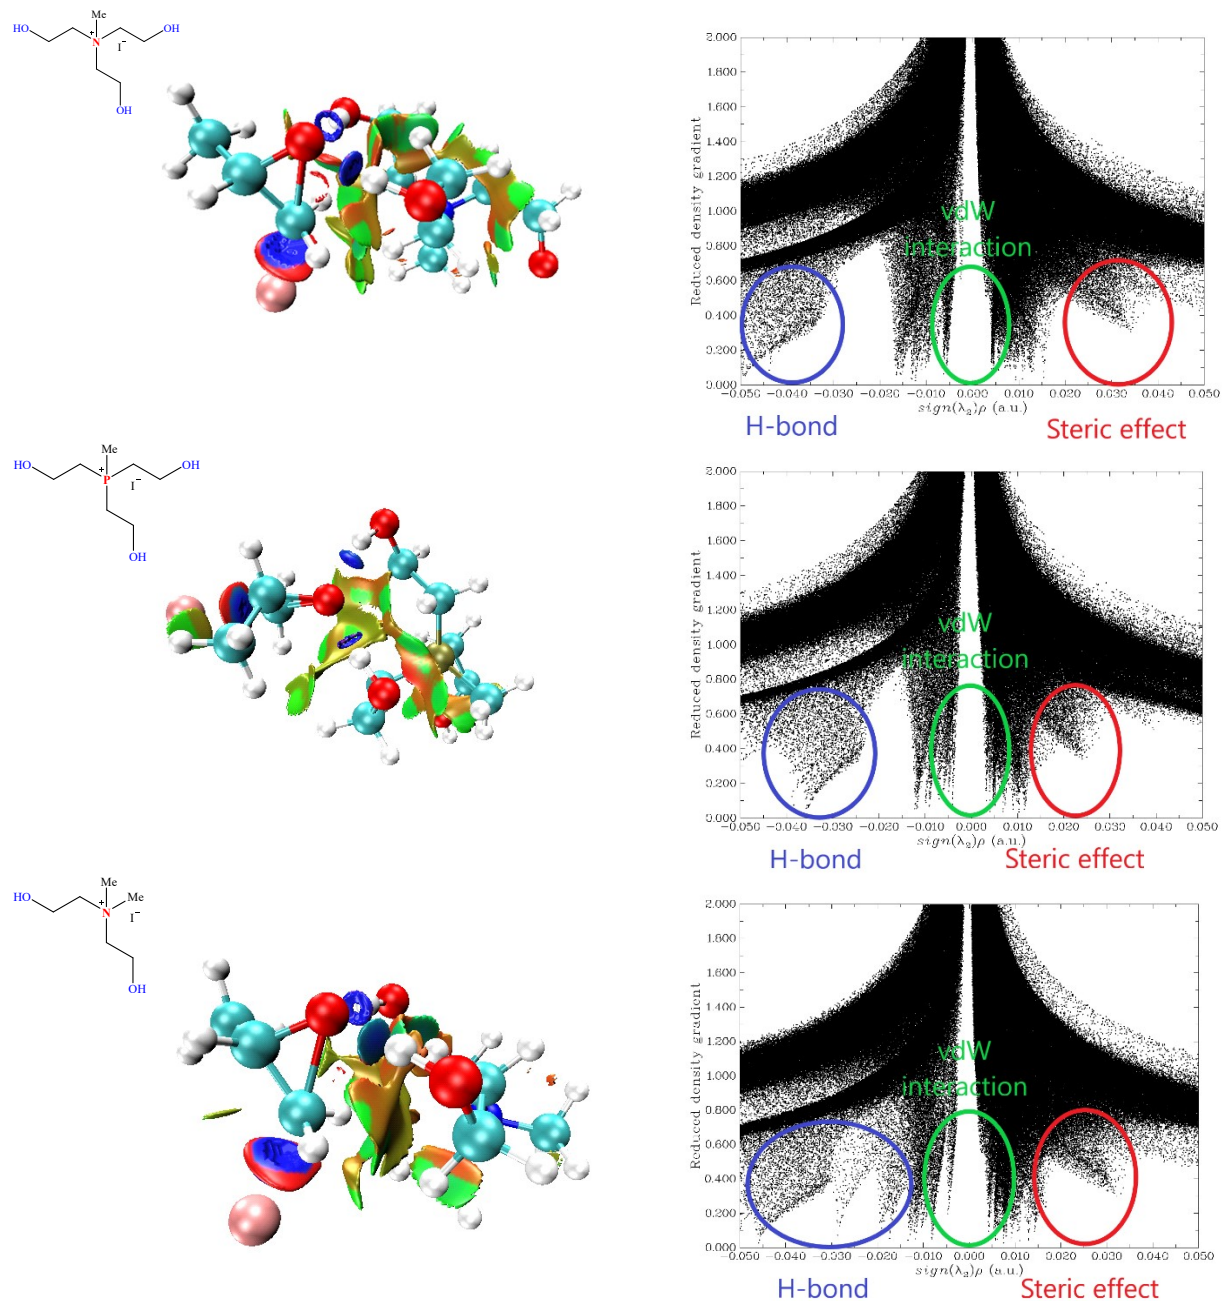

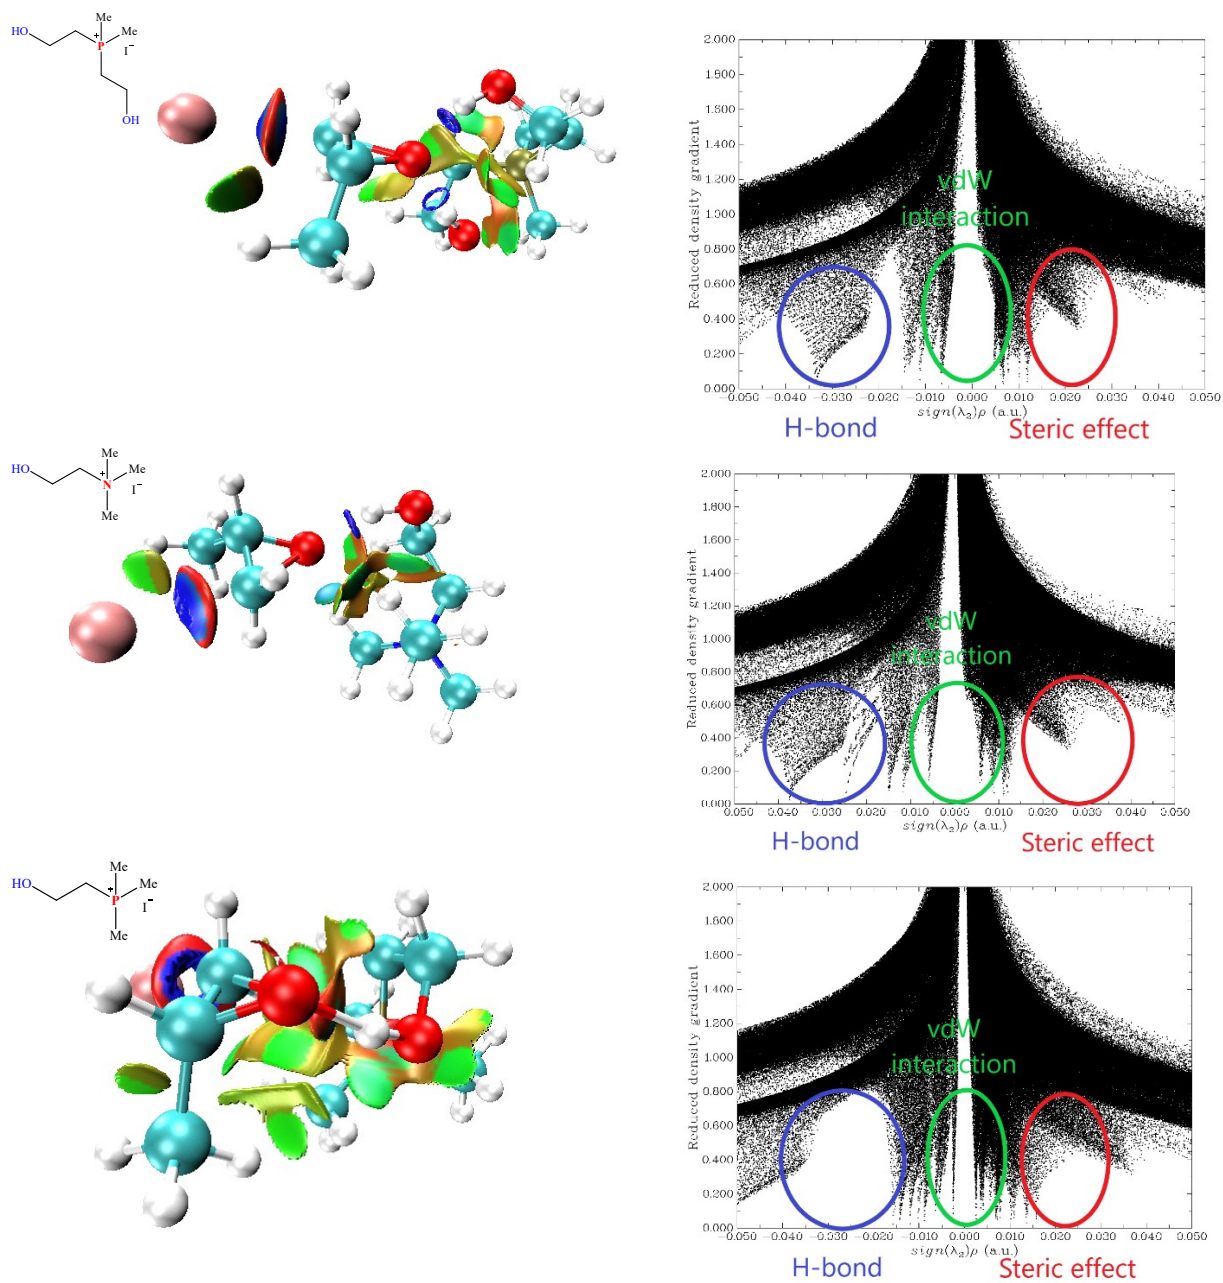

**Fig. S2.** 2D NCI plots for TS1 at right and the corresponding 3D plots are displayed at left.

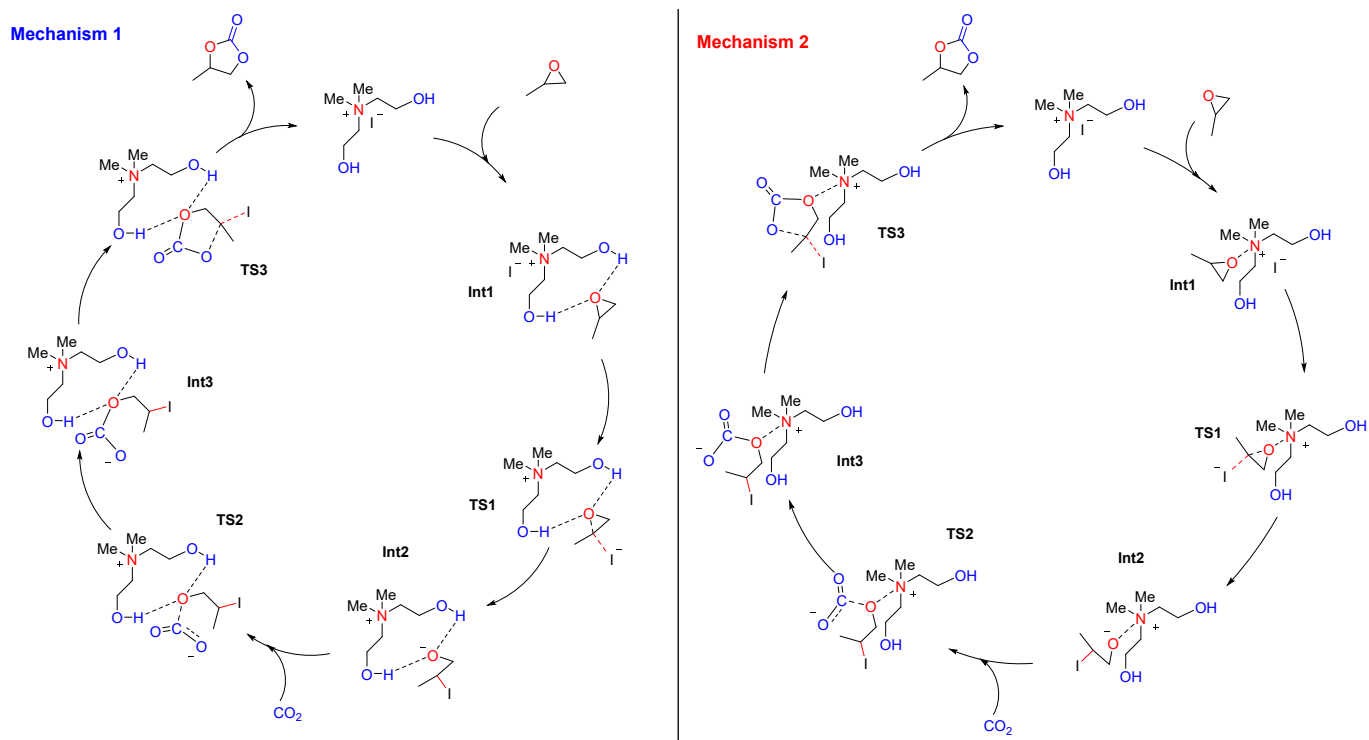

**Fig. S3.** Other suggested mechanisms for CO<sub>2</sub> fixation with propylene oxide.

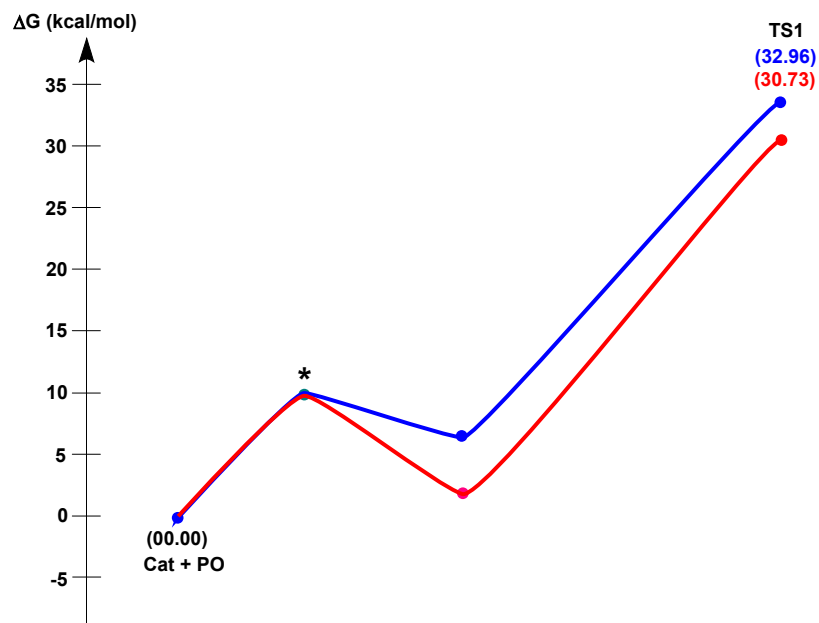

**Fig. S4.** The free energy profile of ring-opening step for other suggested mechanisms. (—) represent mechanism 1 and (—) represent mechanism 2.

**The cartesian coordinates of the optimized geometry of the transition states:**

[HTEA]I-TS1

|   |             |             |             |
|---|-------------|-------------|-------------|
| N | -2.06488700 | -0.33068800 | 0.42036900  |
| C | -1.72950900 | -1.52798700 | 1.26557900  |
| C | -3.25505000 | 0.39840400  | 0.97364500  |
| C | -3.32878400 | 1.85707200  | 0.51831900  |
| O | -3.20765700 | 2.02153100  | -0.86180900 |
| C | -0.27822500 | -1.95935100 | 1.17232600  |
| O | 0.49220700  | -0.96740800 | 1.78109400  |
| C | -2.18153600 | -0.71799700 | -1.03354800 |
| H | -2.25179400 | 2.16470300  | -1.01725600 |
| H | -2.42485800 | -2.32436200 | 0.97224600  |
| H | -1.91748000 | -1.24986700 | 2.31006700  |
| H | -4.14643100 | -0.18666600 | 0.71799200  |
| H | -3.15020100 | 0.38162300  | 2.06634700  |
| H | -2.54864400 | 2.42758900  | 1.04771400  |
| H | -4.30643800 | 2.24268100  | 0.84990300  |
| H | -0.19722300 | -2.92909500 | 1.69558100  |
| H | 0.03372500  | -2.14111700 | 0.12644900  |
| H | -1.51073200 | -1.57485200 | -1.17724400 |
| H | -1.80126700 | 0.12168200  | -1.62189200 |
| C | -3.57675100 | -1.07271700 | -1.48755200 |
| H | -4.20861300 | -0.17046300 | -1.45506600 |
| H | -3.49442000 | -1.38411600 | -2.54335200 |
| O | -4.07251300 | -2.10970400 | -0.67116300 |
| H | -4.95633800 | -2.35351300 | -0.96577500 |
| H | -1.28220400 | 0.40351600  | 0.39648100  |
| H | 1.41303000  | -0.98858700 | 1.45087300  |
| I | 3.29845800  | -0.33459800 | -0.34229000 |
| O | -0.61499300 | 1.71632800  | -0.42524000 |
| C | 0.70949500  | 2.05309300  | -0.10016300 |
| C | 0.89626000  | 0.76693500  | -0.77808000 |
| H | 1.08215500  | 2.90451600  | -0.69186200 |
| H | 0.97516500  | 0.74740600  | -1.86334000 |
| H | 0.59249400  | -0.12632800 | -0.25737600 |
| C | 1.02024200  | 2.20977300  | 1.36642000  |
| H | 2.10615600  | 2.29005400  | 1.51423800  |
| H | 0.54003000  | 3.12302400  | 1.74780500  |
| H | 0.65658700  | 1.34136400  | 1.93150100  |

E= -1009.376348 Hartree       $\bar{\nu}$  = -515.60 cm<sup>-1</sup>

[HTEA]I-TS2

|   |             |             |             |
|---|-------------|-------------|-------------|
| N | -2.34457800 | 0.75324200  | -0.71663600 |
| C | -1.89798600 | 2.09379100  | -1.20110000 |
| C | -2.77496800 | -0.09495700 | -1.86067300 |
| C | -2.93606600 | -1.59245700 | -1.59155000 |

|   |             |             |             |
|---|-------------|-------------|-------------|
| O | -3.98497800 | -1.94642200 | -0.73886900 |
| C | -0.54525200 | 2.55782500  | -0.67389200 |
| O | -0.45599300 | 2.74087800  | 0.70223200  |
| C | -3.47794500 | 0.90780100  | 0.23522200  |
| H | -3.61719400 | -2.07817400 | 0.14781900  |
| H | -2.66867000 | 2.83965000  | -0.94992300 |
| H | -1.83335000 | 2.06568400  | -2.29893300 |
| H | -3.72075000 | 0.30782900  | -2.26566400 |
| H | -2.00880800 | 0.00364700  | -2.64381900 |
| H | -1.97317400 | -2.00731700 | -1.24912500 |
| H | -3.13352300 | -2.04365600 | -2.57797500 |
| H | 0.23289700  | 1.86764100  | -1.04541700 |
| H | -0.33624600 | 3.52984800  | -1.14675500 |
| H | -3.86580400 | -0.08950400 | 0.45170600  |
| H | -4.28565600 | 1.46504700  | -0.27303100 |
| C | -3.10774300 | 1.61929600  | 1.52590400  |
| H | -2.84595000 | 2.67124200  | 1.34225400  |
| H | -3.99784100 | 1.61053500  | 2.17891900  |
| O | -1.99314300 | 1.04121300  | 2.15500400  |
| H | -2.12391900 | 0.07780300  | 2.18911200  |
| H | -1.29497000 | 0.01714700  | -0.14511700 |
| H | -0.73867000 | 1.94549500  | 1.19427100  |
| I | 3.77245300  | 0.00005000  | -0.03187400 |
| O | -0.50767600 | -0.70153500 | 0.29111800  |
| C | 0.80595100  | -0.83823000 | -0.24710200 |
| C | 1.69690200  | 0.13108800  | 0.52620400  |
| H | 1.12318500  | -1.85792800 | 0.01474500  |
| H | 1.66418800  | -0.12776600 | 1.59026300  |
| H | 1.40974400  | 1.18178000  | 0.41114700  |
| C | 0.79162000  | -0.72564900 | -1.76469500 |
| H | 0.12440400  | -1.49447100 | -2.17964500 |
| H | 0.45518300  | 0.25908400  | -2.11826800 |
| H | 1.79727500  | -0.90177700 | -2.16753200 |
| O | -0.33566200 | -2.84841800 | 1.28697300  |
| C | -1.14180100 | -1.99218600 | 1.19276000  |
| O | -2.26837500 | -1.65010300 | 1.47857600  |

E= -1198.018506 Hartree       $\bar{\nu}$  = -539.13 cm<sup>-1</sup>

[HTEA]I-TS3

|   |             |             |             |
|---|-------------|-------------|-------------|
| N | -2.82609000 | 0.20987200  | -0.99991800 |
| C | -2.75067500 | 1.60060100  | -1.58804000 |
| C | -2.61572500 | -0.85227300 | -2.04315400 |
| C | -2.11867600 | -2.19651800 | -1.51468800 |
| O | -2.98505700 | -2.83333500 | -0.63056000 |
| C | -1.62032100 | 2.42941100  | -0.98674200 |
| O | -1.87543900 | 2.85349400  | 0.31132600  |

|   |             |             |             |
|---|-------------|-------------|-------------|
| C | -4.08830400 | -0.02058700 | -0.22323000 |
| H | -2.63509900 | -2.69238700 | 0.26742400  |
| H | -3.71116900 | 2.10101900  | -1.40979000 |
| H | -2.61565000 | 1.49384800  | -2.67156400 |
| H | -3.57134900 | -0.96042900 | -2.57687800 |
| H | -1.86363600 | -0.46588800 | -2.74382800 |
| H | -1.11518500 | -2.05240000 | -1.08192000 |
| H | -1.98516400 | -2.82542600 | -2.41032800 |
| H | -0.67203300 | 1.86540800  | -1.07654200 |
| H | -1.51495300 | 3.32596000  | -1.61479300 |
| H | -4.09752100 | -1.08545900 | 0.03262500  |
| H | -4.93043900 | 0.18189700  | -0.90083400 |
| C | -4.14674400 | 0.86082800  | 1.01842200  |
| H | -4.30053200 | 1.91631800  | 0.74831100  |
| H | -5.02300100 | 0.54125600  | 1.60803100  |
| O | -2.95909000 | 0.80835600  | 1.75401300  |
| H | -2.67746500 | -0.12283200 | 1.88539800  |
| H | -2.03783900 | 0.11932100  | -0.32404300 |
| H | -1.92525100 | 2.09795100  | 0.92691000  |
| I | 4.05890300  | 0.06717800  | -0.41967800 |
| O | -0.38001700 | -0.14765700 | 0.46916300  |
| C | 0.99862100  | 0.30727900  | 0.49765800  |
| C | 1.85310300  | -0.89721200 | 0.87279700  |
| H | 1.22633100  | 0.61283000  | -0.52798700 |
| H | 1.96505100  | -1.72900700 | 0.18306600  |
| H | 2.49519400  | -0.87464500 | 1.74672600  |
| C | 1.12979600  | 1.45913600  | 1.47069700  |
| H | 2.16176000  | 1.83232600  | 1.44267300  |
| H | 0.44135700  | 2.27145200  | 1.20027600  |
| H | 0.89667000  | 1.11645200  | 2.49007700  |
| O | 0.45191800  | -1.68808000 | 1.79670900  |
| C | -0.59158000 | -1.21023400 | 1.30820700  |
| O | -1.77060300 | -1.56524100 | 1.44657200  |

E= -1198.001233 Hartree       $\bar{v} = -520.91 \text{ cm}^{-1}$

[1OH-NI] TS1

|   |             |             |             |
|---|-------------|-------------|-------------|
| N | -3.30585500 | -1.00817100 | 0.22718200  |
| C | -4.25252000 | 0.10728800  | -0.16449100 |
| C | -3.63630100 | 1.48885400  | -0.36657000 |
| O | -2.80958800 | 1.55985500  | -1.47234600 |
| H | -1.87996600 | 1.60253100  | -1.11722100 |
| O | -0.70886200 | 1.27510200  | -0.04367300 |
| C | 0.63151400  | 1.68729800  | 0.10448500  |
| C | 0.72757500  | 0.26960800  | -0.20578500 |
| H | -4.73071800 | -0.21955600 | -1.09879600 |

|   |             |             |             |
|---|-------------|-------------|-------------|
| H | -5.01157600 | 0.14608800  | 0.63050800  |
| H | -4.50748800 | 2.15790600  | -0.49105300 |
| H | -3.11975800 | 1.81139300  | 0.55417900  |
| H | 0.71570800  | -0.05967600 | -1.24082300 |
| I | 3.36278100  | -0.48374200 | -0.13346500 |
| C | -4.12299400 | -2.21893400 | 0.51025200  |
| C | -2.35070100 | -1.32312800 | -0.88476300 |
| C | -2.52659400 | -0.63785400 | 1.45081300  |
| H | -4.78333000 | -2.01412000 | 1.36088700  |
| H | -4.71821800 | -2.46147100 | -0.37777000 |
| H | -3.45108200 | -3.05125100 | 0.74912100  |
| H | -1.98175200 | -1.52936200 | 1.78475900  |
| H | -1.81633900 | 0.16177700  | 1.18348700  |
| H | -3.23272800 | -0.31747600 | 2.22701000  |
| H | -1.74358200 | -2.18178600 | -0.57303500 |
| H | -2.93194500 | -1.56579400 | -1.78146500 |
| H | -1.72019300 | -0.44890200 | -1.05958900 |
| H | 0.59890800  | -0.45308100 | 0.59570900  |
| H | 0.97867000  | 2.35432700  | -0.69922000 |
| C | 1.02982300  | 2.16715200  | 1.47439400  |
| H | 0.59066200  | 3.15388100  | 1.67965800  |
| H | 0.68234100  | 1.45648000  | 2.23893900  |
| H | 2.12473900  | 2.23229700  | 1.53620900  |

E= -819.587231 Hartree       $\bar{\nu}$  = -502.77 cm<sup>-1</sup>

[1OH-NI] TS2

|   |             |             |             |
|---|-------------|-------------|-------------|
| N | -4.05399800 | -0.29629600 | -0.03834800 |
| C | -3.02665600 | -0.37109200 | -1.15701500 |
| C | -2.16398400 | -1.62895300 | -1.14319200 |
| O | -1.57639800 | -1.83666800 | 0.08030300  |
| H | -1.07063100 | -0.91651100 | 0.30786200  |
| O | -0.51382900 | 0.35189400  | 0.49647400  |
| C | 0.81063800  | 0.16391600  | 0.86759100  |
| C | 1.58552600  | -0.02752900 | -0.43925100 |
| H | -3.59697900 | -0.28980300 | -2.09499900 |
| H | -2.39930700 | 0.51775200  | -1.02225700 |
| H | -2.76737500 | -2.50958300 | -1.43453600 |
| H | -1.44010200 | -1.47611000 | -1.97248200 |
| H | 1.46148000  | 0.85261800  | -1.07931300 |
| I | 3.73699900  | -0.23735300 | -0.22025800 |
| C | -4.90147800 | 0.89948700  | -0.31036900 |
| C | -4.88976100 | -1.52337200 | -0.02208600 |
| C | -3.41050900 | -0.12545000 | 1.31733900  |
| H | -4.23781400 | 1.76652500  | -0.40533700 |
| H | -5.45710900 | 0.73846500  | -1.24160400 |
| H | -5.59787000 | 1.04243600  | 0.52386200  |



|   |             |             |             |
|---|-------------|-------------|-------------|
| H | -4.16721900 | 0.29754200  | 1.98914800  |
| H | -3.06131700 | -1.10169900 | 1.65789700  |
| H | -2.53288200 | 0.52539300  | 1.21551300  |
| H | -5.66780500 | -1.40750700 | 0.74251200  |
| H | -5.34734000 | -1.66083800 | -1.00979300 |
| H | -4.24271200 | -2.37238100 | 0.22406100  |
| H | 1.24927900  | -0.93323200 | -0.96078200 |
| O | 0.28312200  | 2.87139100  | 0.16309900  |
| C | -0.80478100 | 2.52578800  | -0.03125200 |
| O | -1.94204900 | 2.48646400  | -0.31454900 |
| H | 1.21253400  | 1.07457100  | 1.35449500  |
| C | 0.96783200  | -1.00878000 | 1.83505900  |
| H | 0.65016400  | -1.94627200 | 1.35323200  |
| H | 2.00348700  | -1.11919500 | 2.18481400  |
| H | 0.31881600  | -0.83711400 | 2.70623300  |

E= -1008.227416 Hartree       $\bar{v}$  = -155.54 cm<sup>-1</sup>

[1OH-NI] TS3

|   |             |             |             |
|---|-------------|-------------|-------------|
| N | 4.52884200  | -0.04739700 | -0.09647200 |
| C | 3.46164600  | -0.61387200 | 0.81949500  |
| C | 2.82926900  | -1.93167300 | 0.39259300  |
| O | 2.08352500  | -1.84463200 | -0.77559800 |
| H | 1.37925800  | -1.18286500 | -0.63039600 |
| O | 0.36111100  | 0.15219000  | 0.05920700  |
| C | -1.00844800 | -0.07007400 | 0.45069400  |
| C | -1.84757200 | 1.07987800  | -0.09031800 |
| H | 3.94256100  | -0.71978600 | 1.80278400  |
| H | 2.68843700  | 0.16294500  | 0.86876300  |
| H | 3.58742300  | -2.72002000 | 0.25371300  |
| H | 2.22085900  | -2.24770100 | 1.26143400  |
| H | -1.95213900 | 1.22512700  | -1.16147600 |
| I | -4.12859000 | -0.31446900 | -0.21710000 |
| C | 4.84869500  | 1.32525800  | 0.40479500  |
| C | 5.74718500  | -0.89475500 | -0.05983200 |
| C | 4.05458900  | 0.08064100  | -1.51627300 |
| H | 3.93277100  | 1.92524600  | 0.32580200  |
| H | 5.17946200  | 1.24861200  | 1.44738100  |
| H | 5.64993500  | 1.74381000  | -0.21573100 |
| H | 4.85268100  | 0.57999600  | -2.07933500 |
| H | 3.84202800  | -0.91431000 | -1.91415700 |
| H | 3.14190200  | 0.68816900  | -1.49929300 |
| H | 6.51363300  | -0.43851500 | -0.69720600 |
| H | 6.10894000  | -0.95926300 | 0.97338600  |
| H | 5.50302300  | -1.89331500 | -0.43741000 |
| H | -2.40014000 | 1.73579700  | 0.57229200  |
| O | -0.33926500 | 2.24007000  | 0.00522900  |

|   |             |             |             |
|---|-------------|-------------|-------------|
| C | 0.66739400  | 1.50056600  | -0.06404700 |
| O | 1.85162800  | 1.78235500  | -0.21650900 |
| C | -1.09674700 | -0.18318900 | 1.95958800  |
| H | -2.13211100 | -0.40976700 | 2.24561600  |
| H | -0.44075000 | -0.98634000 | 2.32205900  |
| H | -0.79316400 | 0.76774500  | 2.42253600  |
| H | -1.30330700 | -1.00346000 | -0.03795200 |

E= -1008.215627 Hartree       $\bar{\nu}$  = -498.66 cm<sup>-1</sup>

[2OH-NI] TS1

|   |             |             |             |
|---|-------------|-------------|-------------|
| N | -2.56348900 | -1.03466200 | 0.33740000  |
| C | -2.49518200 | -0.02503500 | -0.78826700 |
| C | -3.74945700 | -1.91156100 | 0.13152400  |
| C | -2.74300100 | -0.28450800 | 1.64204800  |
| C | -1.65539400 | 0.72713700  | 2.03619300  |
| O | -1.80450000 | 1.96628400  | 1.43684900  |
| C | -1.79206900 | -0.42409200 | -2.08598300 |
| O | -1.60973800 | 0.74337500  | -2.81781800 |
| C | -1.35453300 | -1.91672800 | 0.41648200  |
| H | -1.20145100 | 2.12832000  | 0.65520400  |
| H | -1.12663500 | 1.39228100  | -2.25913700 |
| O | -0.34970600 | 2.26926100  | -0.78347100 |
| C | 0.78039400  | 0.83345600  | -0.63898900 |
| C | 1.02727900  | 2.26979600  | -0.50294300 |
| C | 1.43697800  | 2.81461200  | 0.84278000  |
| H | -3.52686200 | 0.29286000  | -0.98897200 |
| H | -1.96287600 | 0.84326800  | -0.40347400 |
| H | -3.77085300 | -2.67771100 | 0.91559700  |
| H | -3.66866700 | -2.38536600 | -0.85368200 |
| H | -4.65605500 | -1.29855200 | 0.17886400  |
| H | -2.84576100 | -1.05995800 | 2.41457000  |
| H | -3.69137100 | 0.26378600  | 1.55293100  |
| H | -1.79299200 | 0.84692800  | 3.12466300  |
| H | -0.64687400 | 0.28499400  | 1.92230700  |
| H | -0.83952300 | -0.93890800 | -1.86467800 |
| H | -2.40222000 | -1.11358900 | -2.69139400 |
| H | -0.42096000 | -1.34327600 | 0.43998600  |
| H | -1.43648200 | -2.51467800 | 1.33202600  |
| H | -1.34029300 | -2.57798800 | -0.45610100 |
| H | 0.74416200  | 0.40901900  | -1.63849500 |
| H | 0.22784000  | 0.37703500  | 0.16617200  |
| H | 1.63106700  | 2.69311900  | -1.32101500 |
| H | 1.26650900  | 3.89965700  | 0.87622100  |
| H | 2.49965900  | 2.60605900  | 1.02676600  |
| H | 0.84609100  | 2.34858100  | 1.64509100  |
| I | 2.63095200  | -0.89741600 | 0.09175900  |

E= -934.118028 Hartree      $\bar{\nu}$  = -486.20 cm<sup>-1</sup>

[2OH-NI] TS2

|   |             |             |             |
|---|-------------|-------------|-------------|
| N | 3.76243800  | -0.47031900 | 0.44921100  |
| C | 2.71730300  | -1.50396100 | 0.05998500  |
| C | 5.10340900  | -1.11007600 | 0.41897000  |
| C | 3.48532000  | -0.00471000 | 1.86288700  |
| C | 2.28748600  | 0.93344800  | 2.04311400  |
| O | 1.06021200  | 0.34263900  | 1.81202600  |
| C | 2.56944100  | -1.77650600 | -1.43215300 |
| O | 2.06792300  | -0.71330600 | -2.15645100 |
| C | 3.77895300  | 0.71025600  | -0.47204000 |
| H | 0.76108600  | 0.47020800  | 0.84727000  |
| H | 1.33961000  | -0.25314400 | -1.62670500 |
| O | 0.31426900  | 0.45314300  | -0.63112800 |
| C | -1.77675000 | 0.23154300  | 0.44827100  |
| C | -0.95745800 | -0.11206700 | -0.79787900 |
| C | -0.85210500 | -1.61478800 | -1.04413200 |
| H | 2.99830000  | -2.42089700 | 0.59764400  |
| H | 1.76628800  | -1.14498500 | 0.46314400  |
| H | 5.86741100  | -0.34744300 | 0.60997900  |
| H | 5.26122600  | -1.55403500 | -0.57016900 |
| H | 5.14617700  | -1.88640800 | 1.19181200  |
| H | 4.40191400  | 0.50234600  | 2.19938900  |
| H | 3.34095400  | -0.91641700 | 2.46028100  |
| H | 2.35289000  | 1.24156500  | 3.10209100  |
| H | 2.43292800  | 1.84937500  | 1.44475700  |
| H | 3.53284500  | -2.08955400 | -1.87655100 |
| H | 1.91747100  | -2.67372600 | -1.47644700 |
| H | 2.77297700  | 1.13023400  | -0.55941500 |
| H | 4.46678700  | 1.44982300  | -0.04137300 |
| H | 4.11412200  | 0.38287300  | -1.45975000 |
| H | -1.80597100 | 1.31646400  | 0.59303000  |
| H | -1.37459000 | -0.25452300 | 1.34590500  |
| H | -1.45916000 | 0.35815100  | -1.66458100 |
| H | -0.23191900 | -1.79746000 | -1.93339100 |
| H | -1.83810200 | -2.06990000 | -1.20853400 |
| H | -0.38747900 | -2.10998300 | -0.17406700 |
| I | -3.85359700 | -0.35978900 | 0.32055300  |
| O | 1.37953700  | 2.73716500  | -0.53271400 |
| C | 0.30590700  | 2.47360300  | -0.94161500 |
| O | -0.75209400 | 2.65761600  | -1.40054800 |

E= -1122.771530 Hartree      $\bar{\nu}$  = -205.04 cm<sup>-1</sup>

[2OH-NI] TS3

|   |            |             |             |
|---|------------|-------------|-------------|
| N | 4.01410700 | -0.72027800 | -0.40994600 |
|---|------------|-------------|-------------|

|   |             |             |             |
|---|-------------|-------------|-------------|
| C | 3.19073400  | -0.68361300 | 0.86712000  |
| C | 4.71635600  | -2.02601000 | -0.53264100 |
| C | 5.05719900  | 0.37444700  | -0.36257800 |
| C | 4.53863100  | 1.80924300  | -0.32363200 |
| O | 3.96571100  | 2.14858900  | 0.89466100  |
| C | 2.34520100  | -1.92093900 | 1.12454900  |
| O | 1.51266500  | -2.25809500 | 0.05708900  |
| C | 3.14952200  | -0.52413700 | -1.62406800 |
| H | 3.00985000  | 2.26754400  | 0.73905900  |
| H | 0.93266800  | -1.49322800 | -0.11768600 |
| O | 0.02242100  | 0.12491700  | -0.19060400 |
| C | -2.16257800 | 1.09236000  | 0.10380300  |
| C | -1.34011300 | -0.18703300 | 0.18650700  |
| C | -1.34067800 | -0.80156000 | 1.57218500  |
| H | 3.89617300  | -0.51608600 | 1.69209600  |
| H | 2.55694600  | 0.20308400  | 0.77525800  |
| H | 5.35444500  | -1.99695200 | -1.42361200 |
| H | 3.96653700  | -2.81756300 | -0.63749200 |
| H | 5.32920900  | -2.18850500 | 0.36266600  |
| H | 5.68071600  | 0.23102200  | -1.25678000 |
| H | 5.66947000  | 0.18278200  | 0.52988900  |
| H | 5.43369000  | 2.43096100  | -0.50382000 |
| H | 3.85209200  | 1.99354400  | -1.16600200 |
| H | 2.97029400  | -2.79833100 | 1.34791600  |
| H | 1.77919000  | -1.70186300 | 2.04928600  |
| H | 2.47448200  | 0.31981000  | -1.43517800 |
| H | 3.81089100  | -0.32327400 | -2.47653600 |
| H | 2.57226600  | -1.43721200 | -1.78402700 |
| H | -2.36361400 | 1.55325300  | -0.85853600 |
| H | -2.64093200 | 1.51148300  | 0.98178000  |
| H | -1.69417300 | -0.89807300 | -0.56591100 |
| H | -0.71242400 | -1.70381100 | 1.58385100  |
| H | -2.36616100 | -1.08062200 | 1.84625800  |
| H | -0.95476600 | -0.07469300 | 2.30344900  |
| I | -4.50663900 | -0.17879100 | -0.25458200 |
| O | 1.52399300  | 1.76246300  | -0.13828700 |
| C | 0.34550300  | 1.44410900  | 0.03531800  |
| O | -0.62509000 | 2.14630300  | 0.38928900  |

E= -1122.755387 Hartree       $\bar{\nu} = -503.29 \text{ cm}^{-1}$

[3OH-NI] TS1

|   |             |             |             |
|---|-------------|-------------|-------------|
| N | -2.07311000 | -0.42678500 | 0.49674100  |
| C | -1.26129500 | 0.09861300  | 1.67757900  |
| C | -1.87764100 | -1.91856700 | 0.51987300  |
| C | -1.56971500 | 0.03879300  | -0.84700300 |
| C | -1.70836300 | 1.53112700  | -1.18554500 |

|   |             |             |             |
|---|-------------|-------------|-------------|
| O | -0.94481000 | 1.79896000  | -2.30978600 |
| C | -1.17625000 | 1.61710000  | 1.96938400  |
| O | 0.02139400  | 2.22295600  | 1.66235000  |
| C | -3.51722100 | -0.07038000 | 0.70644900  |
| H | -0.10259100 | 2.18801800  | -1.96002900 |
| H | 0.24186400  | 2.43302800  | 0.70272100  |
| H | -1.72137700 | -0.40615500 | 2.53809100  |
| H | -0.24689000 | -0.31445200 | 1.56211800  |
| H | -2.46013600 | -2.36225800 | -0.29040200 |
| H | -2.22281800 | -2.29681300 | 1.48962500  |
| H | -0.80250900 | -2.11484000 | 0.39635000  |
| H | -2.09388100 | -0.56311000 | -1.60191700 |
| H | -0.52013000 | -0.26431400 | -0.87607600 |
| H | -2.76793800 | 1.77208200  | -1.38931100 |
| H | -1.39313800 | 2.16008300  | -0.34374000 |
| H | -2.05717000 | 2.14337900  | 1.55454600  |
| H | -1.28647100 | 1.69033700  | 3.06271000  |
| H | -3.55967700 | 1.01121300  | 0.88728700  |
| H | -3.82814200 | -0.57749500 | 1.63275400  |
| C | -4.47194800 | -0.40098600 | -0.43526800 |
| H | -5.44464800 | 0.03989000  | -0.15632000 |
| H | -4.15577300 | 0.11058200  | -1.35399700 |
| O | -4.57965200 | -1.76280400 | -0.73984200 |
| H | -5.15282600 | -2.19769000 | -0.09880000 |
| I | 2.39947000  | -1.60755500 | -0.06232000 |
| O | 1.03392900  | 2.58616800  | -0.73719000 |
| C | 1.51956700  | 0.77145900  | -0.61438000 |
| C | 2.30907200  | 2.01534900  | -0.60617000 |
| C | 3.06832900  | 2.37701700  | 0.64849400  |
| H | 1.15621400  | 0.43017400  | -1.57927100 |
| H | 0.92923700  | 0.62765700  | 0.27637800  |
| H | 2.92582200  | 2.14706600  | -1.51033300 |
| H | 2.44205400  | 2.20167200  | 1.53364500  |
| H | 3.34542900  | 3.44017700  | 0.61788100  |
| H | 3.98123800  | 1.77026400  | 0.72713100  |

E= -1048.640850 Hartree       $\bar{\nu}$  = -455.55 cm<sup>-1</sup>

[3OH-NI] TS2

|   |            |             |             |
|---|------------|-------------|-------------|
| N | 2.84006200 | -1.29788300 | 0.13949300  |
| C | 1.47538100 | -1.81252700 | -0.29518300 |
| C | 3.87046200 | -2.30629100 | -0.24016700 |
| C | 2.82871100 | -1.16989100 | 1.64729500  |
| C | 2.03135300 | 0.00521700  | 2.22822200  |
| O | 0.66422000 | -0.06592800 | 2.02668700  |
| C | 1.11805000 | -1.66745500 | -1.77007700 |
| O | 0.91421300 | -0.36879100 | -2.19913000 |

|   |             |             |             |
|---|-------------|-------------|-------------|
| C | 3.13836400  | 0.03176700  | -0.51570500 |
| H | 0.39963900  | 0.44956100  | 1.19218100  |
| H | 0.52599200  | 0.19436400  | -1.46069400 |
| H | 1.46102700  | -2.87268500 | -0.00505100 |
| H | 0.74125300  | -1.28089900 | 0.31628000  |
| H | 4.86301900  | -1.90533700 | -0.01581500 |
| H | 3.78591000  | -2.49871700 | -1.31595100 |
| H | 3.67518100  | -3.22859900 | 0.31971100  |
| H | 3.87882100  | -1.10145100 | 1.96358700  |
| H | 2.41611200  | -2.11751400 | 2.02206600  |
| H | 2.24529000  | -0.04147100 | 3.31098400  |
| H | 2.44635600  | 0.96143600  | 1.86914400  |
| H | 1.88540200  | -2.14027600 | -2.41117300 |
| H | 0.21319200  | -2.30003900 | -1.88537200 |
| H | 2.26623500  | 0.67136800  | -0.34657200 |
| H | 3.19014600  | -0.15720600 | -1.59496900 |
| C | 4.38695700  | 0.75250100  | -0.03493400 |
| H | 4.30389500  | 1.77551000  | -0.43668900 |
| H | 4.39634400  | 0.86403900  | 1.05706400  |
| O | 5.60194300  | 0.13485300  | -0.39226600 |
| H | 5.78746800  | 0.32153400  | -1.31912600 |
| I | -4.03946000 | -0.56939900 | 0.21118500  |
| O | -0.02004700 | 1.04224900  | -0.18691400 |
| C | -1.89163200 | -0.36473400 | 0.05924300  |
| C | -1.42011900 | 1.04414100  | -0.31226900 |
| C | -1.83919400 | 1.45727500  | -1.71780900 |
| H | -1.50964600 | -0.65615600 | 1.04461000  |
| H | -1.58459800 | -1.09585500 | -0.70121900 |
| H | -1.85694700 | 1.75636600  | 0.41227400  |
| H | -1.41786300 | 0.75647800  | -2.45545500 |
| H | -1.44980400 | 2.46249600  | -1.92502800 |
| H | -2.93237900 | 1.47772500  | -1.82560900 |
| O | -0.25071400 | 3.57045700  | 0.07752300  |
| C | 0.70211400  | 2.89688800  | 0.13790800  |
| O | 1.85016600  | 2.65807100  | 0.28690100  |

E= -1237.302480 Hartree       $\bar{\nu}$  = -208.32 cm<sup>-1</sup>

[3OH-NI] TS3

|   |             |             |             |
|---|-------------|-------------|-------------|
| N | -3.68456300 | -0.49928300 | -0.34780500 |
| C | -2.75359200 | -0.05695500 | -1.46707700 |
| C | -4.43935600 | -1.71004500 | -0.78690000 |
| C | -4.68696500 | 0.59989200  | -0.07897100 |
| C | -4.11426700 | 1.93474300  | 0.39235900  |
| O | -3.47275000 | 2.63881100  | -0.62066000 |
| C | -1.92456900 | -1.16038900 | -2.10580400 |
| O | -1.15846700 | -1.89092900 | -1.19569200 |

|                                                                |             |             |             |
|----------------------------------------------------------------|-------------|-------------|-------------|
| C                                                              | -2.87582400 | -0.80832400 | 0.90359800  |
| H                                                              | -2.52774300 | 2.67402600  | -0.38536800 |
| H                                                              | -0.58508600 | -1.26005300 | -0.72248300 |
| H                                                              | -3.38387500 | 0.43417200  | -2.22055100 |
| H                                                              | -2.10248200 | 0.70214100  | -1.02503200 |
| H                                                              | -5.18855200 | -1.94690900 | -0.02753300 |
| H                                                              | -3.73111700 | -2.53923300 | -0.89391100 |
| H                                                              | -4.91297500 | -1.49030500 | -1.75197800 |
| H                                                              | -5.39266600 | 0.19389300  | 0.65805300  |
| H                                                              | -5.22729500 | 0.75709000  | -1.02300100 |
| H                                                              | -4.98907100 | 2.50581000  | 0.75153100  |
| H                                                              | -3.44830800 | 1.79130000  | 1.25809500  |
| H                                                              | -2.55407300 | -1.87419400 | -2.65691700 |
| H                                                              | -1.30101600 | -0.65022100 | -2.86400300 |
| H                                                              | -2.10778000 | -0.02416700 | 0.97870200  |
| H                                                              | -2.37177900 | -1.75925300 | 0.70040700  |
| C                                                              | -3.67297100 | -0.86707100 | 2.19755100  |
| H                                                              | -2.94357900 | -1.09665600 | 2.99233800  |
| H                                                              | -4.09375900 | 0.11526200  | 2.44750800  |
| O                                                              | -4.74669500 | -1.77536800 | 2.18717700  |
| H                                                              | -4.41251600 | -2.66819600 | 2.32987500  |
| I                                                              | 4.82661300  | -0.37672400 | 0.33191300  |
| O                                                              | 0.33733200  | 0.19322800  | 0.00237800  |
| C                                                              | 2.56364500  | 1.07413900  | 0.24783600  |
| C                                                              | 1.72062500  | -0.04363900 | -0.35179800 |
| C                                                              | 1.83920800  | -0.12752300 | -1.86065100 |
| H                                                              | 2.67741100  | 1.15754800  | 1.32439600  |
| H                                                              | 3.13747900  | 1.74558900  | -0.38071800 |
| H                                                              | 1.98284400  | -0.99408700 | 0.12260300  |
| H                                                              | 1.54758700  | 0.83301900  | -2.31240000 |
| H                                                              | 1.18982300  | -0.92678200 | -2.24577600 |
| H                                                              | 2.87854500  | -0.35383900 | -2.13135100 |
| O                                                              | 1.08779500  | 2.25039900  | 0.22252300  |
| C                                                              | 0.06970000  | 1.52630700  | 0.22716600  |
| O                                                              | -1.11125800 | 1.82993200  | 0.40638800  |
| E= -1237.286505 Hartree $\bar{\nu}$ = -503.03 cm <sup>-1</sup> |             |             |             |
| [1OH-PI] TS1                                                   |             |             |             |
| C                                                              | 1.85454800  | -0.10759000 | -1.36909300 |
| C                                                              | 2.10023100  | 1.42304700  | -1.34682000 |
| O                                                              | 1.86211300  | 1.95529700  | -0.08921700 |
| H                                                              | 0.94357700  | 2.47605800  | -0.14395400 |
| H                                                              | 2.46168200  | -0.61744100 | -2.13475300 |
| H                                                              | 0.80379600  | -0.38911100 | -1.54492600 |
| H                                                              | 3.14964600  | 1.60043900  | -1.64902400 |
| H                                                              | 1.45717500  | 1.88772900  | -2.11387800 |
| I                                                              | -2.17953900 | -1.06185800 | -0.13024200 |

|   |             |             |             |
|---|-------------|-------------|-------------|
| C | 3.99816100  | -0.29867000 | 0.60943600  |
| C | 1.25921600  | -0.46241900 | 1.61871300  |
| C | 2.27777300  | -2.63902500 | 0.00574500  |
| H | 4.68165300  | -0.55095100 | -0.21232300 |
| H | 3.94654400  | 0.79288000  | 0.73478400  |
| H | 4.34433800  | -0.76994400 | 1.53870800  |
| H | 2.59243200  | -3.13763300 | 0.93219200  |
| H | 1.23727800  | -2.91884700 | -0.22002100 |
| H | 2.93049300  | -2.94720400 | -0.82128700 |
| H | 1.60252900  | -1.05610400 | 2.47774200  |
| H | 1.33905600  | 0.61210800  | 1.81600100  |
| H | 0.21731200  | -0.73212000 | 1.37398300  |
| P | 2.32195000  | -0.84398100 | 0.21886400  |
| C | -1.46531000 | 2.41597300  | 0.13280200  |
| C | -1.06855100 | 1.19418200  | -0.59716700 |
| O | -0.36357300 | 2.98599200  | -0.48181100 |
| H | -1.26298400 | 1.15837900  | -1.66693500 |
| H | -0.14442300 | 0.77562600  | -0.22835600 |
| H | -2.41986600 | 2.84059400  | -0.22608200 |
| C | -1.44057900 | 2.36175300  | 1.64591600  |
| H | -0.50150600 | 1.90433800  | 1.99189500  |
| H | -1.49026800 | 3.38195000  | 2.05145100  |
| H | -2.28343100 | 1.77361800  | 2.03564100  |

E= -1106.231392 Hartree       $\bar{\nu}$  = -459.96 cm<sup>-1</sup>

[1OH-PI] TS2

|   |             |             |             |
|---|-------------|-------------|-------------|
| C | 2.47065600  | -0.74485600 | -1.33386800 |
| C | 1.53886600  | -1.88654500 | -0.89987200 |
| O | 1.20270200  | -1.70735800 | 0.43198400  |
| H | 0.78251300  | -0.73332300 | 0.46083500  |
| H | 1.89322100  | 0.18295600  | -1.43798000 |
| H | 3.03528200  | -0.94264200 | -2.25880400 |
| H | 0.66228600  | -1.89255700 | -1.57651900 |
| H | 2.04580400  | -2.85967200 | -1.03056700 |
| I | -3.89025800 | -0.30888900 | -0.20224700 |
| C | 3.04382400  | 0.25129000  | 1.53804700  |
| C | 4.45053300  | -2.02705000 | 0.38254800  |
| C | 4.94587600  | 0.66733700  | -0.65942600 |
| H | 2.92586100  | -0.57407900 | 2.25007100  |
| H | 3.75209300  | 1.00203000  | 1.91189900  |
| H | 2.04909000  | 0.68663900  | 1.34738400  |
| H | 4.46685800  | 1.62785300  | -0.89015700 |
| H | 5.73012900  | 0.81657200  | 0.09467600  |
| H | 5.38736900  | 0.24219100  | -1.57025000 |
| H | 3.66232000  | -2.66969400 | 0.79978800  |
| H | 4.86969600  | -2.48621000 | -0.52270600 |



|   |             |             |             |
|---|-------------|-------------|-------------|
| H | 5.24441100  | -1.88281700 | 1.12740100  |
| P | 3.67162200  | -0.44089100 | -0.00768900 |
| C | -1.01402700 | 0.62550400  | 0.63979700  |
| C | -1.72506100 | -0.31749700 | -0.33840100 |
| O | 0.32703700  | 0.61286400  | 0.28971800  |
| H | -1.50524600 | -0.01882300 | -1.36910900 |
| H | -1.41999200 | -1.35935200 | -0.17159400 |
| H | -1.44182100 | 1.63830700  | 0.49901100  |
| C | -1.21454000 | 0.20926500  | 2.09654800  |
| H | -0.64979600 | 0.89452500  | 2.74522400  |
| H | -2.27107800 | 0.23262400  | 2.39912300  |
| H | -0.82503700 | -0.81061400 | 2.24869400  |
| C | 1.11338800  | 2.62881400  | -0.35546900 |
| O | 0.13019500  | 3.23213700  | -0.26325900 |
| O | 2.22235100  | 2.29398200  | -0.53861900 |

E= -1294.87011 Hartree       $\bar{\nu}$  = -124.75 cm<sup>-1</sup>

[1OH-PI] TS3

|   |             |             |             |
|---|-------------|-------------|-------------|
| C | -3.14814900 | -0.84237300 | 0.99487000  |
| C | -2.57887000 | -2.11945500 | 0.36348600  |
| O | -1.96773900 | -1.87003000 | -0.86091100 |
| H | -1.21960800 | -1.26393200 | -0.69825600 |
| H | -2.33399900 | -0.14833500 | 1.23748600  |
| H | -3.71653300 | -1.06481300 | 1.91246600  |
| H | -1.88831600 | -2.57025600 | 1.09884300  |
| H | -3.38049600 | -2.85654900 | 0.19293000  |
| I | 4.37736700  | -0.22160400 | -0.23081400 |
| C | -3.79738700 | 0.25730300  | -1.81178400 |
| C | -5.84484000 | -0.83947700 | -0.08595100 |
| C | -4.59586900 | 1.70239900  | 0.63373200  |
| H | -3.56817000 | -0.73254700 | -2.22244000 |
| H | -4.63314700 | 0.73078900  | -2.34587600 |
| H | -2.90114400 | 0.88822500  | -1.84171200 |
| H | -3.65015300 | 2.26035300  | 0.58966300  |
| H | -5.37430200 | 2.21474000  | 0.05254400  |
| H | -4.92805900 | 1.58701300  | 1.67406400  |
| H | -6.22559900 | -0.93825200 | 0.93941800  |
| H | -6.58796400 | -0.31208800 | -0.69905400 |
| H | -5.68197900 | -1.84034800 | -0.50911600 |
| P | -4.27913800 | 0.08039700  | -0.08543700 |
| C | 1.24781000  | -0.18004800 | 0.43791200  |
| C | 2.01811400  | 1.03878500  | -0.05296000 |
| O | -0.13528800 | -0.01513800 | 0.06394100  |
| H | 2.11759400  | 1.23212900  | -1.11702200 |
| H | 2.53621600  | 1.69429300  | 0.63727000  |
| H | 1.58974300  | -1.07201600 | -0.09481500 |

|   |             |             |             |
|---|-------------|-------------|-------------|
| C | 1.34844000  | -0.35698800 | 1.93971700  |
| H | 0.74055700  | -1.21217700 | 2.26518400  |
| H | 2.39612300  | -0.53588700 | 2.21400900  |
| H | 0.99241700  | 0.55291800  | 2.44610600  |
| C | -0.51249200 | 1.31380600  | -0.00151600 |
| O | 0.45161100  | 2.10670400  | 0.08687700  |
| O | -1.71322100 | 1.53872700  | -0.13016200 |

E= -1294.856347 Hartree       $\bar{\nu}$  = -499.85 cm<sup>-1</sup>

[2OH-PI] TS1

|   |             |             |             |
|---|-------------|-------------|-------------|
| C | 4.00031300  | 0.88892400  | -1.09639200 |
| C | 4.85070300  | -1.87941300 | -0.92296700 |
| C | 2.19478100  | -1.27968100 | 0.17621600  |
| C | 1.62497500  | -0.82034500 | 1.52659700  |
| O | 1.74129500  | 0.55828600  | 1.66964900  |
| C | 2.75209900  | 1.77324900  | -1.16026600 |
| C | 4.64874600  | -0.31303100 | 1.53318200  |
| H | 0.99472300  | 0.94839100  | 1.12588900  |
| H | 4.88296300  | 1.43705300  | -0.73178200 |
| H | 4.21272000  | 0.54016400  | -2.11861200 |
| H | 4.36825000  | -2.11721000 | -1.88120400 |
| H | 4.90570600  | -2.78853200 | -0.30935900 |
| H | 5.86503800  | -1.50311100 | -1.11313900 |
| H | 2.25362100  | -2.37593400 | 0.09539200  |
| H | 1.58618900  | -0.88818900 | -0.65281600 |
| H | 0.57910300  | -1.16475200 | 1.58987400  |
| H | 2.16986500  | -1.31229900 | 2.34919200  |
| H | 4.03782200  | 0.43090900  | 2.06302600  |
| H | 4.67651800  | -1.24619200 | 2.11174400  |
| H | 5.67211300  | 0.05491800  | 1.38231100  |
| I | -4.15465000 | -0.56117300 | -0.20902000 |
| P | 3.87280700  | -0.61469600 | -0.07130500 |
| C | -1.45628600 | 0.16656400  | -0.22209900 |
| C | -1.41953400 | 1.57373400  | 0.12921500  |
| O | -0.06498800 | 1.17462200  | -0.04015500 |
| H | -1.36845500 | -0.57934000 | 0.56284800  |
| H | -1.44880200 | -0.14060700 | -1.26384600 |
| H | -1.76629100 | 2.25964000  | -0.65572100 |
| C | -1.80809700 | 1.99661200  | 1.51839800  |
| H | -1.42299300 | 3.00122800  | 1.74285800  |
| H | -2.90375600 | 1.99377900  | 1.59984500  |
| H | -1.40206200 | 1.28704900  | 2.25460900  |
| H | 2.43439900  | 2.05819800  | -0.14398100 |
| O | 1.75971100  | 1.08357800  | -1.84591600 |
| H | 0.91689500  | 1.19609600  | -1.33290900 |

H 3.04644200 2.69979500 -1.68650000  
E= -1220.761421 Hartree  $\bar{\nu} = -510.20 \text{ cm}^{-1}$

[2OH-PI] TS2

C 3.31552300 0.54238100 -0.77653700  
C 3.68163800 -2.30600700 -1.29439700  
C 1.69922800 -1.61784400 0.72376900  
C 1.43577400 -0.88483500 2.04644000  
O 1.72379700 0.46659600 1.94121200  
C 2.48123900 0.59676800 -2.06329100  
C 4.52268200 -1.12917200 1.29034400  
H 1.06568900 0.85928900 1.27799300  
H 2.92599800 1.25488600 -0.03565600  
H 4.37742600 0.77582000 -0.95901500  
H 2.85971600 -2.29372000 -2.02503200  
H 3.77560200 -3.30994300 -0.86041600  
H 4.61970800 -2.02787700 -1.79343900  
H 1.74775000 -2.71132500 0.85236800  
H 0.93765700 -1.38460900 -0.03177800  
H 0.38797100 -1.08357200 2.34469400  
H 2.06876500 -1.31858100 2.83919300  
H 5.51490300 -0.91388900 0.87300000  
H 4.24441000 -0.34769400 2.01262900  
H 4.53281100 -2.10882400 1.78677200  
I -3.72988200 -0.82139700 -0.22908500  
P 3.27224600 -1.09557600 -0.01427200  
C -1.60948200 -0.40739000 -0.12260600  
C -1.28055100 1.02596200 0.30037500  
O 0.09115400 1.21683000 0.08832300  
H -1.21345300 -1.14385400 0.58903600  
H -1.22646500 -0.61280100 -1.12951300  
H -1.84990800 1.71319100 -0.35136200  
C -1.64952100 1.32169600 1.74816000  
H -1.07611200 0.67142800 2.42875900  
H -1.39491800 2.36566500 1.97328700  
H -2.72205700 1.17433900 1.93585900  
H 2.39871400 1.65799200 -2.35243600  
O 1.24323000 -0.01371200 -1.88362400  
H 0.73466800 0.50826700 -1.18320400  
H 3.01042300 0.07195600 -2.87703300  
C 0.53140000 3.08805300 -0.20821300  
O 1.70672900 3.03293300 -0.32877700  
O -0.50076700 3.64658600 -0.17005600  
E= -1409.413597 Hartree  $\bar{\nu} = -175.62 \text{ cm}^{-1}$

[2OH-PI] TS3

|   |             |             |             |
|---|-------------|-------------|-------------|
| C | -3.21390800 | -0.88012100 | 1.16269900  |
| C | -4.87302000 | -1.96304700 | -1.01286100 |
| C | -3.78283000 | 0.76429900  | -1.31932500 |
| C | -3.91988100 | 2.19444200  | -0.77354100 |
| O | -3.56747600 | 2.27824500  | 0.57418600  |
| C | -2.16850000 | -1.88409400 | 0.64602500  |
| C | -5.89282100 | 0.21920200  | 0.65882200  |
| H | -2.59871600 | 2.12797600  | 0.62518100  |
| H | -2.75667900 | 0.07174600  | 1.45931500  |
| H | -3.77970500 | -1.28745400 | 2.01507000  |
| H | -3.97312600 | -2.34230500 | -1.51566700 |
| H | -5.65660200 | -1.74019800 | -1.74910300 |
| H | -5.24485500 | -2.71087000 | -0.29897900 |
| H | -4.33466500 | 0.62962700  | -2.26258000 |
| H | -2.73014100 | 0.49439700  | -1.47414500 |
| H | -3.31623400 | 2.86444900  | -1.40889000 |
| H | -4.96729200 | 2.52452200  | -0.86252900 |
| H | -6.32629000 | -0.52632500 | 1.33840400  |
| H | -5.58930600 | 1.11530000  | 1.21752200  |
| H | -6.63288400 | 0.48979000  | -0.10670000 |
| I | 4.98150700  | -0.03900700 | -0.25594000 |
| P | -4.41153800 | -0.45365100 | -0.13054800 |
| C | 2.51231600  | 0.85918100  | 0.33518000  |
| C | 1.82142200  | -0.46940300 | 0.05045100  |
| O | 0.44632700  | -0.18928000 | -0.28571400 |
| H | 2.94193400  | 1.07385100  | 1.30692800  |
| H | 2.66907700  | 1.57671800  | -0.46467200 |
| H | 2.25407600  | -0.92552400 | -0.84404100 |
| C | 1.86706000  | -1.41376700 | 1.23467300  |
| H | 1.32485100  | -2.34086200 | 1.00277000  |
| H | 2.91230000  | -1.65889100 | 1.46312400  |
| H | 1.40903100  | -0.93305100 | 2.11310000  |
| H | -1.27726700 | -1.82621100 | 1.29183800  |
| O | -1.84803800 | -1.66701200 | -0.69794700 |
| H | -1.02532700 | -1.14288700 | -0.73472100 |
| H | -2.57281500 | -2.90538400 | 0.74202500  |
| C | -0.01481400 | 0.96346400  | 0.29155900  |
| O | -1.22597100 | 1.16966300  | 0.18859800  |
| O | 0.87187100  | 1.64622700  | 0.84933500  |

E= -1409.396998 Hartree       $\bar{\nu}$  = -501.56 cm<sup>-1</sup>

[3OH-PI] TS1

|   |            |             |             |
|---|------------|-------------|-------------|
| C | 2.40939800 | 1.52935100  | -0.96372800 |
| C | 3.82521600 | -1.01283200 | -1.25809600 |
| C | 1.64987600 | -0.79548100 | 0.74466500  |
| C | 1.26329000 | -0.12280300 | 2.07230200  |

|   |             |             |             |
|---|-------------|-------------|-------------|
| O | 1.26330800  | 1.26516200  | 1.97153900  |
| C | 1.43322400  | 1.17129500  | -2.10874800 |
| O | 0.56569700  | 2.21721800  | -2.35650300 |
| C | 4.83565400  | -1.95726800 | -0.62137900 |
| O | 4.22393100  | -2.55385700 | 0.49555000  |
| C | 4.22429600  | 0.60868000  | 1.18460000  |
| H | 1.87497100  | 2.14063900  | -0.22307700 |
| H | 3.27513800  | 2.10387400  | -1.32761400 |
| H | 4.31254400  | -0.38751200 | -2.02087900 |
| H | 3.01946400  | -1.57590300 | -1.75502600 |
| H | 1.96998200  | -1.83808500 | 0.87438200  |
| H | 0.81202700  | -0.76641200 | 0.03168800  |
| H | 0.28759100  | -0.53137500 | 2.39406600  |
| H | 1.99417900  | -0.40974700 | 2.84559200  |
| H | 2.00296000  | 0.96257800  | -3.02806300 |
| H | 0.88673400  | 0.24043100  | -1.85401800 |
| H | 5.73658600  | -1.38801100 | -0.32689400 |
| H | 5.14682500  | -2.70426600 | -1.37043000 |
| H | 4.79389200  | -3.24311900 | 0.85427900  |
| H | 3.70334000  | 1.28675300  | 1.87498900  |
| H | 4.58188300  | -0.28338900 | 1.71553700  |
| H | 5.06257000  | 1.12764200  | 0.70092800  |
| I | -3.99322700 | -0.94436400 | -0.21424200 |
| P | 3.01469600  | 0.09584100  | -0.05129900 |
| C | -1.60157400 | 0.44907200  | -0.22339000 |
| C | -1.84568000 | 1.75364900  | 0.36444700  |
| O | -0.45279500 | 1.72484000  | 0.07813900  |
| H | -1.27540400 | -0.36283700 | 0.42101500  |
| H | -1.59182400 | 0.32922800  | -1.30401700 |
| H | -2.40129200 | 2.45461700  | -0.27475500 |
| C | -2.22270900 | 1.84796900  | 1.81743400  |
| H | -2.03943800 | 2.86133600  | 2.20095800  |
| H | -3.28579300 | 1.59517700  | 1.93093200  |
| H | -1.63206800 | 1.13461200  | 2.41167900  |
| H | 0.53484600  | 1.52681500  | 1.33432000  |
| H | 0.02382600  | 2.28391600  | -1.53969900 |

E= -1335.295628 Hartree       $\bar{\nu} = -506.99 \text{ cm}^{-1}$

[3OH-PI] TS2

|   |            |             |             |
|---|------------|-------------|-------------|
| C | 2.25475200 | 0.42550600  | 1.59479700  |
| C | 4.93084600 | 0.27732800  | 0.44042500  |
| C | 2.60921200 | -0.28814700 | -1.30242200 |
| C | 1.42263400 | -1.24785000 | -1.51040400 |
| O | 0.63487600 | -1.32515800 | -0.37125300 |
| C | 2.11524000 | 1.94184200  | 1.30331000  |
| O | 0.87801100 | 2.40471900  | 1.70522500  |

|   |             |             |             |
|---|-------------|-------------|-------------|
| C | 6.02603400  | -0.66509100 | -0.03661100 |
| O | 5.63258300  | -1.19843800 | -1.27709600 |
| C | 3.37366900  | -2.20245200 | 0.82834600  |
| H | 1.25717700  | -0.03070900 | 1.53410000  |
| H | 2.67122800  | 0.22609700  | 2.59435700  |
| H | 5.12682100  | 0.59380000  | 1.47563700  |
| H | 4.89546800  | 1.18473300  | -0.18269200 |
| H | 3.44711100  | -0.47154900 | -1.98920500 |
| H | 2.27365000  | 0.75501500  | -1.40883200 |
| H | 0.86234500  | -0.90359100 | -2.39935200 |
| H | 1.80922000  | -2.25479500 | -1.74578800 |
| H | 2.89905600  | 2.49077800  | 1.85043400  |
| H | 2.28378700  | 2.13233300  | 0.22455700  |
| H | 6.17470900  | -1.46449700 | 0.71279600  |
| H | 6.97285100  | -0.10385000 | -0.11197000 |
| H | 6.34182500  | -1.74140400 | -1.63802100 |
| H | 2.34956600  | -2.59969500 | 0.79635000  |
| H | 4.00928600  | -2.71149400 | 0.09187600  |
| H | 3.79354900  | -2.31058600 | 1.83729700  |
| I | -4.53252400 | -0.71777100 | -0.00509600 |
| P | 3.25482700  | -0.45754900 | 0.38155900  |
| C | -2.46951800 | -0.26573900 | -0.48135600 |
| C | -1.76533100 | 0.61428800  | 0.55256700  |
| O | -0.48504300 | 0.87815700  | 0.05317500  |
| H | -1.96159800 | -1.23291900 | -0.58435000 |
| H | -2.51235100 | 0.25164400  | -1.44541400 |
| H | -2.33608800 | 1.55962300  | 0.63398000  |
| C | -1.66048800 | -0.03569000 | 1.93026400  |
| H | -1.06220900 | 0.61389200  | 2.58614100  |
| H | -2.64392600 | -0.19647400 | 2.39254500  |
| H | -1.15151200 | -1.01008300 | 1.84115400  |
| H | 0.15879900  | -0.40881200 | -0.22707900 |
| H | 0.23359900  | 1.91740700  | 1.12034500  |
| C | -0.41152200 | 2.31685000  | -1.44429100 |
| O | 0.73045200  | 2.24100200  | -1.71311900 |
| O | -1.52140200 | 2.67411500  | -1.47942200 |

E= -1523.937616 Hartree       $\bar{\nu}$  = -196.80 cm<sup>-1</sup>

[3OH-PI] TS3

|   |            |             |             |
|---|------------|-------------|-------------|
| C | 2.86373800 | 1.03354300  | 1.19627500  |
| C | 4.76631100 | 1.51357200  | -0.96729800 |
| C | 3.28233700 | -1.05287300 | -0.91992500 |
| C | 3.24495500 | -2.39994700 | -0.18070800 |
| O | 2.86016100 | -2.25078900 | 1.15132800  |
| C | 1.83362300 | 1.89328000  | 0.44126700  |
| O | 0.84610200 | 2.33268600  | 1.30910000  |

|   |             |             |             |
|---|-------------|-------------|-------------|
| C | 6.13057300  | 1.14361900  | -1.53192000 |
| O | 6.04327800  | -0.15710400 | -2.06084500 |
| C | 5.39649300  | -0.49572300 | 1.09424500  |
| H | 2.33349100  | 0.23173700  | 1.72689700  |
| H | 3.42114500  | 1.64618600  | 1.92224700  |
| H | 4.83379700  | 2.44523600  | -0.38605400 |
| H | 4.03721100  | 1.68018100  | -1.77567900 |
| H | 3.85371300  | -1.10553200 | -1.85616200 |
| H | 2.25822800  | -0.70295700 | -1.11739900 |
| H | 2.58043600  | -3.08131900 | -0.73870900 |
| H | 4.25125300  | -2.84841700 | -0.19190300 |
| H | 2.33881400  | 2.77369500  | 0.00658000  |
| H | 1.40675000  | 1.30334300  | -0.38850300 |
| H | 6.88787500  | 1.19791600  | -0.72836600 |
| H | 6.41141100  | 1.88316700  | -2.30034000 |
| H | 6.86761600  | -0.38597700 | -2.50427400 |
| H | 4.94525200  | -1.25235400 | 1.75031900  |
| H | 6.11898900  | -0.96131600 | 0.41114600  |
| H | 5.88394000  | 0.28715700  | 1.69047600  |
| I | -5.41704600 | 0.11950300  | -0.71049500 |
| P | 4.05826300  | 0.22030000  | 0.11666200  |
| C | -3.01631800 | -0.86341300 | 0.00062200  |
| C | -2.52364500 | 0.42417400  | 0.64959700  |
| O | -1.08170600 | 0.42872900  | 0.57868200  |
| H | -3.59492300 | -1.58973000 | 0.55974900  |
| H | -2.86735900 | -1.03476100 | -1.06124900 |
| H | -2.84481600 | 1.28479500  | 0.05673800  |
| C | -2.96440900 | 0.54712700  | 2.09383500  |
| H | -2.54282900 | 1.45443800  | 2.54644000  |
| H | -4.06018300 | 0.60164200  | 2.13138100  |
| H | -2.62583300 | -0.33065100 | 2.66428300  |
| H | 1.91998200  | -1.96141700 | 1.13915900  |
| H | 0.10309900  | 1.70925400  | 1.23688900  |
| C | -0.55350900 | -0.82856100 | 0.56050100  |
| O | 0.67782400  | -0.90706500 | 0.62525700  |
| O | -1.40171600 | -1.74286400 | 0.45818800  |

E= -1523.922240 Hartree       $\bar{\nu} = -500.78 \text{ cm}^{-1}$

[2OH-AsI] TS1

|   |            |             |             |
|---|------------|-------------|-------------|
| C | 2.34274900 | 0.74767700  | 1.07216700  |
| C | 3.96446100 | -1.72789700 | 0.05428600  |
| C | 2.22053900 | -0.18825400 | -1.97295400 |
| C | 1.11181300 | 0.82743700  | -2.29921200 |
| O | 1.33012300 | 2.03274800  | -1.65284900 |
| C | 1.50274900 | 0.60506600  | 2.35945200  |
| O | 1.01331900 | 1.83387600  | 2.76268300  |

|    |             |             |             |
|----|-------------|-------------|-------------|
| C  | 0.92416100  | -2.03365500 | 0.23522200  |
| H  | 0.65890100  | 2.23175100  | -0.93427300 |
| H  | 0.49740000  | 2.21142800  | 2.01371700  |
| O  | -0.23324000 | 2.43389300  | 0.40955300  |
| C  | -1.17422000 | 0.87289100  | 0.47766400  |
| C  | -1.60116300 | 2.23290200  | 0.15230200  |
| C  | -2.07565900 | 2.54884100  | -1.24333400 |
| H  | 3.39892000  | 0.97457500  | 1.27676300  |
| H  | 1.93937300  | 1.57103500  | 0.46980400  |
| H  | 3.97596700  | -2.57881700 | -0.63871300 |
| H  | 4.05618500  | -2.09365000 | 1.08522400  |
| H  | 4.80413900  | -1.05797100 | -0.17077900 |
| H  | 2.12782200  | -1.10430100 | -2.57663800 |
| H  | 3.19606600  | 0.27337700  | -2.18872800 |
| H  | 1.14616300  | 0.97262900  | -3.39343800 |
| H  | 0.12154300  | 0.38068800  | -2.09054400 |
| H  | 0.69648700  | -0.13628700 | 2.19312500  |
| H  | 2.12959200  | 0.20173800  | 3.16971300  |
| H  | -0.09360700 | -1.62872100 | 0.10370700  |
| H  | 1.06175400  | -2.87315700 | -0.45959700 |
| H  | 1.03241900  | -2.39413600 | 1.26650100  |
| H  | -1.09616000 | 0.59901800  | 1.52631400  |
| H  | -0.59113600 | 0.34644200  | -0.26679400 |
| H  | -2.25055500 | 2.68263700  | 0.91950900  |
| H  | -2.04063700 | 3.63357100  | -1.41446900 |
| H  | -3.10468500 | 2.18957800  | -1.37942100 |
| H  | -1.43669400 | 2.05970100  | -1.99276500 |
| I  | -2.95635300 | -1.04026200 | 0.04910000  |
| As | 2.31161400  | -0.75883200 | -0.12997500 |

E= -3115.278109 Hartree       $\bar{\nu} = -496.11 \text{ cm}^{-1}$

[2OH-BiI] TS1

|   |             |             |             |
|---|-------------|-------------|-------------|
| C | -2.56393200 | 1.42363900  | -0.56200900 |
| C | -3.37418600 | -1.83667000 | 0.46092400  |
| C | -0.42544200 | -0.72523600 | 1.95616200  |
| C | -0.20966200 | 0.63642900  | 2.65405100  |
| O | -0.84953300 | 1.70699700  | 2.02549600  |
| C | -2.25794600 | 1.69150900  | -2.02727300 |
| O | -0.90256000 | 1.59365600  | -2.31713900 |
| C | -0.53796300 | -1.52893400 | -1.58287100 |
| H | -0.28399900 | 2.08189400  | 1.29968800  |
| H | -0.39360200 | 2.09593400  | -1.62861700 |
| O | 0.42995700  | 2.42616300  | -0.20153900 |
| C | 1.44812800  | 0.93735800  | -0.32948800 |
| C | 1.83619400  | 2.34618000  | -0.27562200 |
| C | 2.58827100  | 2.85262300  | 0.92690500  |



|    |             |             |             |
|----|-------------|-------------|-------------|
| H  | -3.63514900 | 1.30612600  | -0.34792500 |
| H  | -2.12150800 | 2.15950000  | 0.11778100  |
| H  | -3.01046600 | -2.83865700 | 0.71947300  |
| H  | -3.99267800 | -1.88521000 | -0.44371300 |
| H  | -3.95751100 | -1.42246800 | 1.29236400  |
| H  | 0.50571000  | -1.21831400 | 1.63226200  |
| H  | -1.01575800 | -1.43369800 | 2.55314600  |
| H  | -0.60619700 | 0.56297900  | 3.67726200  |
| H  | 0.87742800  | 0.80444600  | 2.74729000  |
| H  | -2.79664800 | 0.97475400  | -2.67007900 |
| H  | -2.67075400 | 2.69276800  | -2.26494200 |
| H  | 0.49081900  | -1.71601400 | -1.23864500 |
| H  | -1.06545300 | -2.46319600 | -1.80586400 |
| H  | -0.54964100 | -0.82713600 | -2.42484300 |
| H  | 1.11403500  | 0.52655800  | -1.27811700 |
| H  | 1.17884100  | 0.47409500  | 0.60779300  |
| H  | 2.23787100  | 2.73996400  | -1.22161800 |
| H  | 2.53190700  | 3.94857300  | 0.97617700  |
| H  | 3.64094300  | 2.54375400  | 0.87090000  |
| H  | 2.15227800  | 2.44070000  | 1.84914300  |
| I  | 3.34584100  | -0.93999000 | -0.23264500 |
| Bi | -1.61932200 | -0.50992500 | 0.07147100  |

E= -1093.837035 Hartree       $\bar{\nu}$  = -495.11 cm<sup>-1</sup>

[2OH-SbI] TS1

|   |             |             |             |
|---|-------------|-------------|-------------|
| C | -1.41285900 | -1.32449300 | -0.74533900 |
| C | -3.97350600 | 1.25469800  | -0.78183100 |
| C | -2.28588100 | 0.30555400  | 2.22070700  |
| C | -1.01623300 | 1.06736000  | 1.83972000  |
| O | -1.26021300 | 1.58061300  | 0.55158900  |
| C | -1.38766700 | -1.04215500 | -2.25160200 |
| O | -1.41591500 | 0.31990500  | -2.54154100 |
| C | -4.44912000 | -1.77868500 | 0.62175000  |
| H | -0.40908000 | 1.52333700  | -0.03195800 |
| H | -0.56249500 | 0.70643200  | -2.24815200 |
| O | 0.65058400  | 1.10205000  | -1.00275300 |
| C | 1.94815000  | 0.11155900  | -0.47913800 |
| C | 2.00215400  | 1.49119200  | -0.95273000 |
| C | 2.34299000  | 2.58684000  | 0.01872800  |
| H | -0.47483300 | -0.99890400 | -0.27475600 |
| H | -1.56310700 | -2.39399100 | -0.53576600 |
| H | -5.05410100 | 1.07169700  | -0.79248700 |
| H | -3.54235800 | 1.28266500  | -1.79019300 |
| H | -3.73615000 | 2.19041000  | -0.26279000 |
| H | -2.12150100 | -0.56272700 | 2.87283400  |
| H | -3.05601900 | 0.94568600  | 2.67463300  |

|    |             |             |             |
|----|-------------|-------------|-------------|
| H  | -0.79676300 | 1.87199600  | 2.55977300  |
| H  | -0.14952900 | 0.38253700  | 1.83563700  |
| H  | -0.49514900 | -1.53933800 | -2.67357200 |
| H  | -2.26432900 | -1.50631600 | -2.73215300 |
| H  | -5.28027100 | -1.35676000 | 1.20226500  |
| H  | -4.83730300 | -2.14279300 | -0.33908800 |
| H  | -4.01515800 | -2.62139800 | 1.17556800  |
| H  | 1.99304000  | -0.72165000 | -1.17440300 |
| H  | 1.75697200  | -0.06746400 | 0.57540300  |
| H  | 2.44665100  | 1.63068900  | -1.94730100 |
| H  | 1.95961900  | 3.55511600  | -0.33269700 |
| H  | 3.43455500  | 2.63949200  | 0.12779100  |
| H  | 1.91391000  | 2.36627700  | 1.00803100  |
| I  | 4.55825500  | -0.60903300 | 0.26571800  |
| Sb | -2.96348900 | -0.27505900 | 0.27490900  |

E= -1119.550206 Hartree       $\bar{\nu}$  = -515.63 cm<sup>-1</sup>

PO

|   |             |             |             |
|---|-------------|-------------|-------------|
| O | 0.80852200  | -0.76827500 | -0.26411400 |
| C | 1.04805700  | 0.60227600  | -0.04712900 |
| C | -0.14879100 | -0.06015900 | 0.48903900  |
| C | -1.50154200 | 0.11107000  | -0.14375000 |
| H | 1.88553800  | 0.83932000  | 0.61754100  |
| H | 0.94732100  | 1.24613700  | -0.92834700 |
| H | -0.14706600 | -0.31054100 | 1.55779200  |
| H | -2.07024800 | 0.90835600  | 0.35517100  |
| H | -2.08042800 | -0.82054700 | -0.07150000 |
| H | -1.38963900 | 0.36435700  | -1.20670700 |

CO<sub>2</sub>

|   |            |             |             |
|---|------------|-------------|-------------|
| C | 0.00000000 | 0.00000000  | -0.00257500 |
| O | 0.00000000 | 1.17961900  | 0.00096600  |
| O | 0.00000000 | -1.17961900 | 0.00096600  |
